# Supplementary material
Source: Springer Nature journal article supplement (https://www.springermedizin.de/resource/supplementary/12939_2013_375_MOESM3_ESM.pdf/9551020)
Supplement: MOESM3 [file 9551020]

**Table 9. Relative odds of self-reported racial discrimination in the last 12 months when applying for work or at work, Indigenous Australians aged 15-64 years, 2008-09.<sup>†,‡</sup>**

|                                          | Model 1§<br>OR (95% CI) | Model 2§<br>OR (95% CI) | Model 3§<br>OR (95% CI) | Model 4§<br>OR (95% CI) |
|------------------------------------------|-------------------------|-------------------------|-------------------------|-------------------------|
| Married                                  | 0.8 (0.6-1.1)           | 0.8 (0.6-1.1)           | ---                     | 0.8 (0.6-1.2)           |
| Remote area residence                    | 0.7 (0.5-0.9)**         | 0.7 (0.5-1.0)*          | ---                     | 0.5 (0.3-0.7)**         |
| Highest qualification                    |                         |                         |                         |                         |
| University degree                        | 2.7 (1.5-4.8)**         | 3.1 (1.6-5.9)**         | ---                     | 2.6 (1.3-4.9)**         |
| Diploma/certificate                      | 1.3 (0.9-2.0)           | 1.3 (0.9-1.9)           | ---                     | 1.2 (0.8-1.9)           |
| Year 12 only                             | 1.0 (0.6-1.6)           | 1.0 (0.6-1.7)           | ---                     | 1.1 (0.7-1.8)           |
| Year 10/11 only                          | 1.0                     | 1.0                     | ---                     | 1.0                     |
| <Year 10 only                            | 0.7 (0.4-1.0)           | 0.7 (0.5-1.1)           | ---                     | 0.7 (0.4-1.1)           |
| Labour force status                      |                         |                         |                         |                         |
| Employed                                 | 1.0                     | 1.0                     | ---                     | 1.0                     |
| Unemployed                               | 3.0 (2.1-4.2)***        | 3.0 (2.0-4.4)***        | ---                     | 2.7 (1.8-4.2)***        |
| Not in labour force                      | 0.5 (0.3-0.8)**         | 0.6 (0.4-0.9)*          | ---                     | 0.6 (0.4-0.9)*          |
| Home owned or being<br>purchased         | 0.6 (0.5-0.9)**         | 0.5 (0.3-0.7)***        | ---                     | 0.6 (0.4-1.0)*          |
| Equivalised household<br>income quintile |                         |                         |                         |                         |
| 1 (lowest)                               | 1.0                     | 1.0                     | ---                     | 1.0                     |
| 2                                        | 0.9 (0.6-1.4)           | 0.9 (0.6-1.3)           | ---                     | 0.9 (0.6-1.4)           |
| 3                                        | 1.3 (0.8-2.2)           | 1.3 (0.8-2.1)           | ---                     | 1.5 (0.9-2.7)           |
| 4                                        | 0.9 (0.6-1.4)           | 0.8 (0.5-1.4)           | ---                     | 0.9 (0.5-1.7)           |
| 5 (highest)                              | 1.9 (0.9-4.0)           | 1.7 (0.7-4.0)           | ---                     | 2.1 (0.9-5.1)           |

|                                                 |                  |               |                  |                  |
|-------------------------------------------------|------------------|---------------|------------------|------------------|
| Not known/Not stated                            | 1.0 (0.7-1.5)    | 1.1 (0.7-1.6) | ---              | 1.1 (0.7-1.7)    |
| SEIFA quintile                                  |                  |               |                  |                  |
| 1 (most disadvantaged)                          | 1.0              | 1.0           | ---              | 1.0              |
| 2                                               | 1.4 (0.9-2.0)    | 1.3 (0.8-2.0) | ---              | 1.4 (1.0-2.2)    |
| 3                                               | 0.8 (0.5-1.3)    | 0.8 (0.5-1.3) | ---              | 0.8 (0.5-1.3)    |
| 4                                               | 1.4 (0.8-2.3)    | 1.4 (0.8-2.6) | ---              | 1.6 (0.9-3.0)    |
| 5                                               | 1.6 (0.4-5.6)    | 1.4 (0.4-5.7) | ---              | 1.6 (0.3-7.4)    |
| Main language not English                       | 0.7 (0.4-1.0)*   | ---           | 0.4 (0.2-0.6)*** | 0.7 (0.4-1.2)    |
| Household members all                           | 1.6 (1.1-2.3)*   | ---           | 1.2 (0.8-1.9)    | 1.2 (0.7-2.0)    |
| Indigenous                                      |                  |               |                  |                  |
| Identifies with clan, tribal, language group    | 2.4 (1.7-3.4)*** | ---           | 1.4 (1.0-2.1)    | 1.2 (0.8-1.8)    |
| Identifies homelands                            | 3.7 (2.4-5.8)*** | ---           | 2.5 (1.5-4.2)*** | 2.6 (1.5-4.4)**  |
| Participated in cultural events, past 12 months | 2.2 (1.5-3.1)*** | ---           | 1.4 (0.9-2.1)    | 1.3 (0.9-2.0)    |
| Taken away from natural family                  | 2.5 (1.7-3.8)*** | ---           | 2.1 (1.3-3.2)**  | 2.3 (1.4-3.7)**  |
| % friends who are Indigenous                    |                  |               |                  |                  |
| Most or all                                     | 1.0              | ---           | 1.0              | 1.0              |
| About half                                      | 1.2 (0.8-1.8)    | ---           | 1.1 (0.7-1.7)    | 0.8 (0.5-1.3)    |
| Few                                             | 0.4 (0.3-0.6)*** | ---           | 0.5 (0.4-0.8)**  | 0.4 (0.2-0.6)*** |
| Level of trust                                  |                  |               |                  |                  |
| High                                            | 1.0              | ---           | 1.0              | 1.0              |

|        |                  |     |                  |                  |
|--------|------------------|-----|------------------|------------------|
| Medium | 1.4 (0.9-2.0)    | --- | 1.2 (0.8-1.9)    | 1.2 (0.8-1.9)    |
| Low    | 2.0 (1.4-2.8)*** | --- | 2.0 (1.4-2.8)*** | 1.9 (1.3-2.8)*** |

† Source: Weighted data from the National Aboriginal and Torres Strait Islander Social Survey 2008-09 confidentialised unit record file (CURF) [11,12].

‡ People aged 65 years and over have been excluded due to problems in estimation resulting from very low reporting in older age groups. Includes only those with complete data on all variables of interest. Comparison group is those aged 15-64 years reporting no discrimination in any setting (total N=5,286).

§ Model 1: Adjusted for age group and sex and the variable shown.

Model 2: Adjusted for age group, sex and the socio-demographic variables listed.

Model 3: Adjusted for age group, sex, and the cultural variables listed.

Model 4: Adjusted for age group, sex, and the socio-demographic and cultural variables listed.

\*  $p < 0.05$ ; \*\*  $p < 0.01$ ; \*\*\*  $p < 0.001$
